# Supplementary material for: Acute tryptophan depletion in accordance with body weight: influx of amino acids across the blood–brain barrier
Source: PubMed Central journal article supplement (PMC3424286; doi:10.1007/s00702-012-0793-z), 2012-05-24
Supplement: 702_2012_793_MOESM1_ESM.pdf [file 702_2012_793_MOESM1_ESM.pdf]

## Supplementary online materials

**Tab. 2**

|                    | <b>Age (years)</b> | <b>Weight (kg)</b> | <b>BMI (kg/m<sup>2</sup>)</b> |
|--------------------|--------------------|--------------------|-------------------------------|
| <b>Full sample</b> | 25.34 ± 2.09       | 70.54 ± 11.86      | 23.04 ± 1.86                  |
| <b>Males</b>       | 25.39 ± 2.43       | 80.08 ± 6.30       | 24.01 ± 1.55                  |
| <b>Females</b>     | 25.30 ± 1.69       | 61.00 ± 7.70       | 22.07 ± 1.63                  |

**Legend:** Tab. 2 provides the means ± standard deviations of the characteristics of the full sample (n = 24) and for males (n = 12) and females (n = 12).

**Tab. 3**

| Amino acid | Sample | ATD     |       |         |       |         |       |         |       | BAL     |       |         |       |         |       |         |       |
|------------|--------|---------|-------|---------|-------|---------|-------|---------|-------|---------|-------|---------|-------|---------|-------|---------|-------|
|            |        | Mean T0 | SD T0 | Mean T1 | SD T1 | Mean T2 | SD T2 | Mean T3 | SD T3 | Mean T0 | SD T0 | Mean T1 | SD T1 | Mean T2 | SD T2 | Mean T3 | SD T3 |
| ILE        | m      | 67.6    | 12.1  | 337.0   | 95.0  | 346.6   | 69.2  | 166.4   | 56.9  | 66.9    | 16.8  | 254.4   | 61.5  | 293.0   | 77.4  | 189.8   | 68.8  |
|            | f      | 63.5    | 14.4  | 273.3   | 96.8  | 303.1   | 118.0 | 212.6   | 89.1  | 60.5    | 14.3  | 256.7   | 85.9  | 292.9   | 106.2 | 221.8   | 127.3 |
|            | Total  | 65.6    | 13.2  | 305.2   | 99.3  | 324.8   | 97.1  | 189.5   | 76.8  | 63.7    | 15.6  | 255.6   | 73.1  | 293.0   | 90.9  | 205.8   | 101.4 |
| LEU        | m      | 131.0   | 22.0  | 582.9   | 121.4 | 560.2   | 119.1 | 295.4   | 93.6  | 130.4   | 31.2  | 501.8   | 96.3  | 506.1   | 102.2 | 298.7   | 107.2 |
|            | f      | 113.0   | 26.2  | 534.1   | 136.4 | 535.0   | 203.0 | 310.1   | 114.0 | 110.5   | 27.7  | 495.2   | 102.3 | 497.8   | 149.6 | 321.5   | 161.9 |
|            | Total  | 122.0   | 25.4  | 558.5   | 128.7 | 547.6   | 163.3 | 302.7   | 102.3 | 120.5   | 30.6  | 498.5   | 97.3  | 502.0   | 125.3 | 310.1   | 134.8 |
| LYS        | m      | 155.0   | 32.0  | 536.1   | 86.0  | 434.7   | 84.8  | 275.9   | 53.0  | 150.4   | 30.7  | 471.4   | 97.4  | 351.8   | 43.7  | 235.3   | 61.5  |
|            | f      | 139.2   | 44.7  | 563.9   | 135.5 | 418.5   | 135.9 | 258.7   | 65.5  | 137.2   | 29.7  | 490.0   | 102.9 | 350.9   | 85.3  | 220.9   | 61.8  |
|            | Total  | 147.1   | 38.9  | 550.0   | 111.8 | 426.6   | 111.1 | 267.3   | 58.9  | 143.8   | 30.3  | 480.7   | 98.5  | 351.3   | 66.3  | 228.1   | 60.7  |
| MET        | m      | 28.5    | 6.8   | 209.5   | 49.4  | 239.7   | 58.4  | 167.3   | 44.0  | 25.8    | 5.8   | 183.2   | 39.4  | 198.9   | 35.5  | 150.3   | 41.3  |
|            | f      | 24.1    | 6.1   | 214.9   | 47.1  | 252.1   | 57.4  | 200.9   | 46.5  | 25.7    | 5.3   | 209.2   | 44.0  | 231.1   | 58.3  | 190.2   | 58.4  |
|            | Total  | 26.3    | 6.7   | 212.2   | 47.3  | 245.9   | 57.0  | 184.1   | 47.5  | 25.7    | 5.5   | 196.2   | 43.0  | 215.0   | 50.0  | 170.3   | 53.5  |
| PHE        | m      | 61.3    | 7.5   | 404.4   | 76.3  | 461.8   | 98.3  | 288.5   | 88.8  | 63.5    | 9.9   | 354.8   | 67.4  | 393.4   | 87.1  | 270.3   | 67.5  |
|            | f      | 53.6    | 8.0   | 444.6   | 87.2  | 542.9   | 146.9 | 379.2   | 114.2 | 57.5    | 10.0  | 443.4   | 116.3 | 490.7   | 134.8 | 356.9   | 73.4  |
|            | Total  | 57.5    | 8.5   | 424.5   | 82.7  | 502.3   | 129.1 | 333.9   | 110.2 | 60.5    | 10.2  | 399.1   | 103.4 | 442.1   | 121.6 | 313.6   | 81.9  |
| THR        | m      | 125.7   | 16.9  | 277.7   | 62.5  | 279.8   | 48.4  | 229.0   | 38.6  | 126.1   | 26.1  | 243.9   | 45.5  | 222.2   | 21.1  | 185.6   | 35.9  |
|            | f      | 146.5   | 43.8  | 309.5   | 69.2  | 306.3   | 59.1  | 272.3   | 75.3  | 146.0   | 43.6  | 269.6   | 57.3  | 259.8   | 63.2  | 232.1   | 78.2  |
|            | Total  | 136.1   | 34.1  | 293.6   | 66.5  | 293.0   | 54.5  | 250.7   | 62.6  | 136.0   | 36.6  | 256.8   | 52.3  | 241.0   | 49.9  | 208.8   | 64.1  |
| TYR        | m      | 62.8    | 14.5  | 109.2   | 19.6  | 113.1   | 27.5  | 95.9    | 25.2  | 59.3    | 11.8  | 103.4   | 28.4  | 96.8    | 27.9  | 81.9    | 22.5  |
|            | f      | 53.3    | 13.4  | 88.1    | 16.9  | 94.0    | 17.9  | 89.5    | 13.3  | 54.6    | 15.7  | 90.7    | 29.1  | 95.1    | 41.2  | 90.7    | 39.6  |
|            | Total  | 58.0    | 14.5  | 98.6    | 20.9  | 103.5   | 24.7  | 92.7    | 20.0  | 57.0    | 13.8  | 97.0    | 28.9  | 95.9    | 34.4  | 86.3    | 31.8  |
| VAL        | m      | 219.8   | 40.0  | 912.3   | 150.1 | 931.7   | 156.1 | 609.0   | 157.5 | 218.9   | 44.2  | 818.7   | 126.1 | 808.8   | 105.8 | 572.1   | 131.3 |
|            | f      | 197.3   | 42.6  | 932.9   | 168.1 | 948.9   | 226.8 | 657.4   | 140.5 | 197.9   | 42.4  | 911.0   | 114.4 | 891.4   | 201.3 | 666.0   | 200.6 |
|            | Total  | 208.6   | 42.0  | 922.6   | 156.2 | 940.3   | 190.6 | 633.2   | 148.0 | 208.4   | 43.7  | 864.8   | 126.8 | 850.1   | 162.8 | 619.0   | 172.6 |
| TRP        | m      | 55.3    | 11.0  | 49.8    | 16.8  | 37.7    | 21.5  | 29.0    | 16.4  | 56.0    | 11.6  | 336.5   | 53.4  | 368.5   | 66.2  | 283.8   | 71.8  |
|            | f      | 54.4    | 7.9   | 53.8    | 20.9  | 39.9    | 25.7  | 28.4    | 18.0  | 56.1    | 9.9   | 355.2   | 48.9  | 395.2   | 85.1  | 318.2   | 81.4  |
|            | Total  | 54.8    | 9.4   | 51.8    | 18.6  | 38.8    | 23.2  | 28.7    | 16.8  | 56.0    | 10.5  | 345.9   | 51.0  | 381.8   | 75.8  | 301.0   | 77.1  |
| fTRP       | m      | 11.3    | 3.1   | 10.8    | 4.8   | 8.0     | 4.4   | 5.9     | 3.6   | 11.4    | 3.9   | 105.1   | 28.5  | 132.1   | 36.3  | 79.6    | 37.8  |
|            | f      | 10.9    | 3.0   | 11.4    | 4.9   | 8.0     | 5.4   | 5.9     | 3.8   | 12.1    | 3.9   | 126.0   | 41.0  | 153.5   | 46.4  | 100.0   | 37.8  |
|            | Total  | 11.1    | 3.0   | 11.1    | 4.8   | 8.0     | 4.8   | 5.9     | 3.6   | 11.7    | 3.8   | 115.5   | 36.1  | 142.8   | 42.2  | 89.8    | 38.4  |

**Legend:** Tab. 3 provides concentrations ( $\mu\text{mol/l}$ ) of the amino acids isoleucine (ILE), leucine (LEU), lysine (LYS), methionine (MET), phenylalanine (PHE), threonine (THR), tyrosine (TYR), valine (VAL), total (TRP) and free tryptophan (fTRP) obtained under acute tryptophan depletion (ATD) and after the intake of a TRP balanced amino acid load (BAL), which served as a control condition. The data were obtained at different time points (T0-T3); T0 served as a baseline prior to ATD/BAL administration on separate days (T1 = 90 minutes, T2 = 180 minutes, and T3 = 270 minutes after ATD/BAL intake). The values are depicted as the means  $\pm$  standard deviations (SDs) for the full sample (total) and for females (f) and males (m).
